# Supplementary material for: Effect of flaxseed gum on the brittleness of oleogels based on candelilla wax
Source: Royal Society of Chemistry journal article supplement (doi:10.1039/d2ra04341f), 2022-01-01
Supplement: d2ra04341f1.pdf [file d2ra04341f1.pdf]

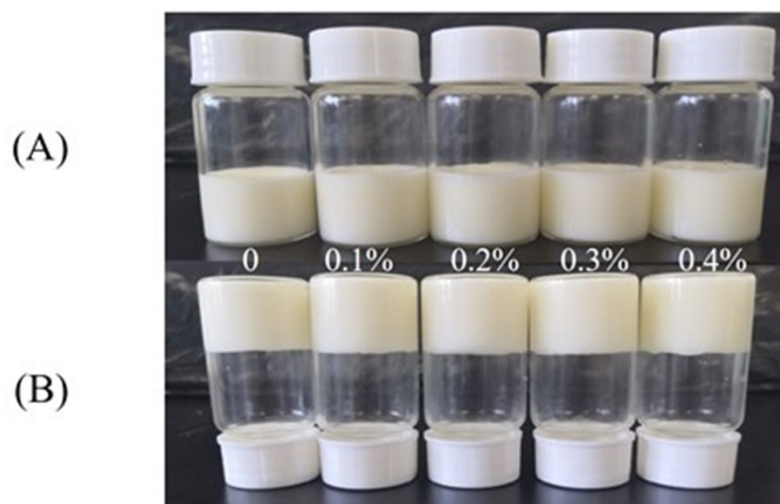

Figure S1. Oleogels formation with different flaxseed gum concentrations (0%–0.4%). (A); oleogels samples cooled at room temperature (B); inverted method for gelation confirmation.
